# Supplementary material for: Distinct Cytoplasmic and Nuclear Functions of the Stress Induced Protein DDIT3/CHOP/GADD153
Source: PLoS One. 2012 Apr 9;7(4):e33208. doi: 10.1371/journal.pone.0033208 (PMC3322118; doi:10.1371/journal.pone.0033208)
Supplement: Table S1 — Sequence of primers used for QPCR analysis. (XLS) [file pone.0033208.s011.xls]

## Sheet: 1
Primer sequences
Gene		Forward primer (5’-3’)	Reverse primer (5’-3’)
DUSP1		AGGACAACCACAAGGCAGAC	ACCCTTCCTCCAGCATTCTT
FOSL2		GGGAACTTTGACACCTCGTC	TCTACCCGGAATTTC TGCTG
IRF2BP2		GCCCTTCGAGAGCAAGTT TA	AGAGGGCTTCCTTTTCCTTG
JUN		CAGGTGGCACAGCTTAAACA	GTTTGCAAC TGCTGCGTTAG
KLF13		GGAAATCTTCGCACCTCAAG	GCGAACTTCTTG TTGCAG TC
NR4A3		CTGCAAGGGCTTTTTCAAGA	ACATCGGTTTCGACGTCTCT
SNF1LK		CGGACACCTCAC TGACTCAA	TCAGTCCCAGAAACCCTTTG
CREB1		GAAGCGGAGTGTTGGTGAGT	GGGCTAATGTGGCAATCTGT
SNAI1		CAATCGGAAGCCTAACTACAGC	GACAGAGTCCCAGATGAGCA
SNAI2		GCCAAACTACAGCGAACTGG	AGGAGGTGTCAGATGGAGGA
JUN		TTCTATGACGATGCCCTCAA	CCGTTGCTGGACTGGATTA
SCOTIN		CAGCAGCACCCTACCCAAT	CACTCACGCACACACACAAC
HERPUD1		CGTTGGGTGGTTTCCATTTA	TGGTTGGGGTCTTCAGTTTC
MAPRE1		CTGGTGTGGTGCGAAAGA	CGTTCTCCTGGCAAATCAAT
CEBPB		CTTCTCCCTCTGCCCCTCT	CAACAAGCCCGTAGGAACAT
GADD45B		ATCAACATCGTGCGGGTGT	GATTCTGCTGCTGGGAAGG
EGR1		GCAGCACCTTCAACCCTCA	GTCTCCACCAGCACCTTCTC
CLSPN		CAGTGGCTGTCTTCTTGTGG	GCTGCCTTTCTTTCCTTCCT
TREX1		GATGGTGGTGAGAGGGACAG	CGAAAAAGATGAGGGTCTGC
DAP3		TTGAGGAAAATGATGAAAAATGA	TGGAAACCAGGATGGGAATA
BCORL1		TGATGTGACGGAATCTCTGC	CCTGGGGCTTTTCTTGGT
ID1		AAGGTGAGCAAGGTGGAGATT	CTTCAGCGACACAAGATGC
ID2		CTGACCACCCTCAACACG	AACTTGTCCTCCTTGTGAAATG
ID3		GGAACTTGTCATCTCCAACGA	TCACAGTCCTTCGCTCCTG
RBL1		CACCTTCTACCCCACTGACC	TTCCACAGGATTACGCACAC
RND3		TGCTGTGCTGATTTGCTTTG	CGTCTGCCTGTGATTGGA
SGK1		ATGAAGCAGAGGAGGATGG	GTGGAGGAGAAGGGTTGG
PLK2		GAACACCCGCAGTAGAAAACA	CAGACATCCCCGAAGAACC
TPO		GACTGGTTTTGGTGGGAGAA	GACCCGAGACAGGGAGTG
ATF3		CTCGGGGTGTCCATCACA	TCTTCTTGTTTCGGCACTTTG
IL7R		CATACACACTGGCTCACACATC	CTGGGTCCTCAAAAGCACA
HDAC4		CGAAAAGAGACCAGATGAGGA	GACAGACAGACAAGAGAACAGCA
CDK6		CGTGGTCAGGTTGTTTGATGT	CGGTGTGAATGAAGAAAGTCC
E2F7		CCTTTAGCCCACCCAGTATTT	ATCCCTCTCTGACCCTGACC
KIF23		TCACACCACCCAGAAGGAA	CCAAACAACGAGGAAGCA
TAF15		GTGGCTATGGAGGCAAAATG	GAAAGCAGCAGGCAAAACTC
FUS		AAACAAGAAAACGGGACAGC	GGCGAGTAGCAAATGAGACC
GADD45A		AAGGGGCTGAGTGAGTTCAA	TTTTCCTTCCTGCATGGTTC
CCND1		AGAGGCGGAGGAGAACAAA	TGAGGCGGTAGTAGGACAGG
SMAD3		CGACTACAGCCATTCCATCC	TGGTCACTGGTTTCTCCATCT
CDC25A		GTCGCCTGTCACCAACCT	CGGAGGAGCCCATTCTCT
